# Supplementary material for: High-Resolution Metabolomics of 50 Neurotransmitters and Tryptophan Metabolites in Feces, Serum, and Brain Tissues Using UHPLC-ESI-Q Exactive Mass Spectrometry
Source: PubMed Central journal article supplement — ACS Omega. 2021 Mar 15;6(12):8094–103. doi: 10.1021/acsomega.0c05789 (PMC8014936; doi:10.1021/acsomega.0c05789), 2021-03-15
Supplement: ao0c05789_si_001.pdf [file ao0c05789_si_001.pdf]

# Supporting Information for

## High-resolution metabolomics of 50 neurotransmitters and tryptophan metabolites in feces, serum, and brain tissues using UHPLC-ESI-Q Exactive mass spectrometry

**Authors:** Yunjia Lai †, Chih-Wei Liu †, Liang Chi †, Hongyu Ru †, Kun Lu †.\*

**Affiliations:**

† Department of Environmental Sciences and Engineering, Gillings School of Global Public Health, University of North Carolina at Chapel Hill, NC 27599, USA.

Texts prepared for submission to *ACS Omega*.

\*Correspondence to [kunlu@unc.edu](mailto:kunlu@unc.edu); Tel: +1 (919) 966-7337.

Number of pages: 5

Number of figures: 2

Number of tables: 2

### Table of Contents

**Figure S1.** Overview of sample processing for addressing wide dynamic ranges of compounds: Page S2

**Figure S2.** Barplots of analytical recovery in sample matrices as indicated by SIL standards: Page S3

**Table S1.** Sample pretreatment procedures for individual compounds: Page S4

**Table S2.** Analyte recovery rates in sample matrices: Page S5

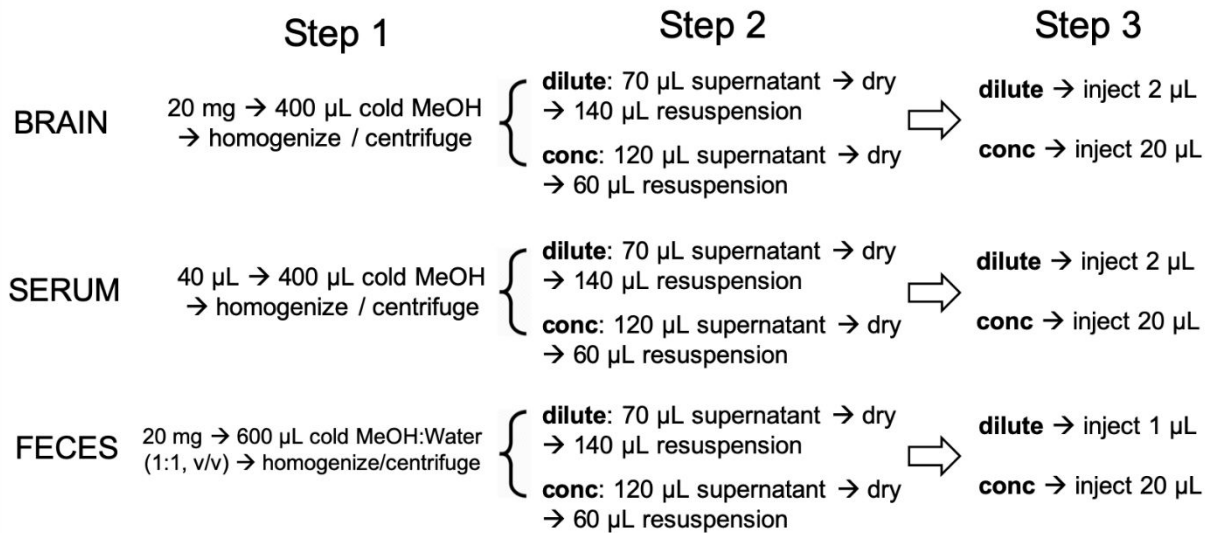

*Figure S1.* Overview of sample processing procedures. ‘conc’ stands for ‘concentration’.

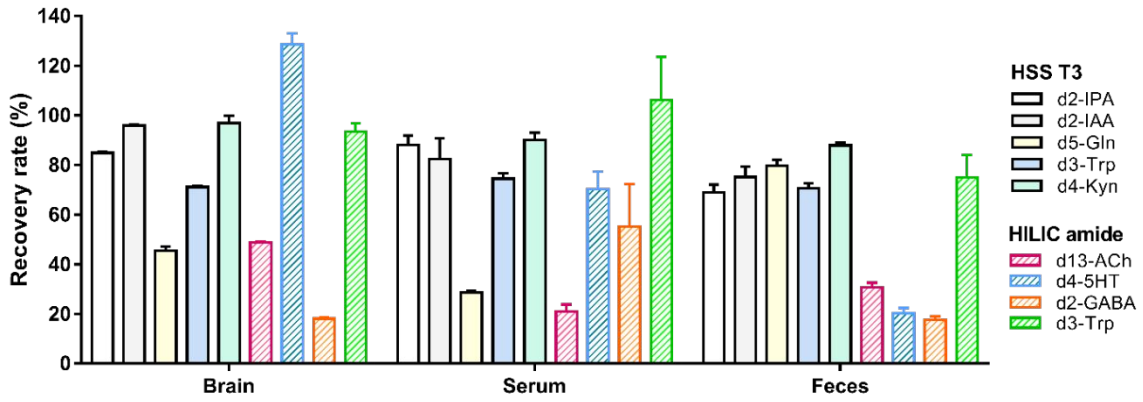

**Figure S2.** Barplots of analytical recovery in the three sample matrices (Mean  $\pm$  SEM, n=4).

**Table S1.** Sample adaptation to maintain within linearity of assay.

| <b>Compound Name</b>                   | <b>Brain</b> | <b>Serum</b> | <b>Feces</b> |
|----------------------------------------|--------------|--------------|--------------|
| 3-Aminopiperidine-2,6-dione            | *conc        | conc         | conc         |
| 5-HIAA                                 | conc         | conc         | conc         |
| 5-Hydroxy-N $\omega$ -methyltryptamine | conc         | conc         | conc         |
| Acetylcholine                          | *dilute      | dilute       | dilute       |
| Choline                                | dilute       | dilute       | dilute       |
| Histamine                              | conc         | conc         | conc         |
| Kynurenic acid                         | conc         | conc         | conc         |
| L-Methionine                           | dilute       | dilute       | dilute       |
| L-Proline                              | conc         | dilute       | conc         |
| L-Pyroglutamic acid                    | dilute       | dilute       | conc         |
| L-Tyrosine                             | dilute       | dilute       | conc         |
| Nicotinic acid                         | conc         | conc         | dilute       |
| N $\alpha$ -Acetyl-L-glutamine         | conc         | conc         | conc         |
| Serotonin                              | conc         | dilute       | conc         |
| Trimethylamine N-oxide                 | dilute       | dilute       | dilute       |
| Tyramine                               | conc         | conc         | conc         |
| $\gamma$ -Aminobutyric acid            | dilute       | conc         | conc         |
| 2-Phenethylamine                       | conc         | conc         | conc         |
| 2-Pyrrolidinone                        | dilute       | dilute       | dilute       |
| 3-Hydroxyanthranilic acid              | dilute       | dilute       | conc         |
| 4-Methoxyindole                        | conc         | conc         | conc         |
| AMFK                                   | conc         | conc         | conc         |
| Anthranilic acid                       | conc         | dilute       | conc         |
| Coumarin                               | conc         | conc         | conc         |
| Hippuric acid                          | conc         | conc         | conc         |
| Indole                                 | conc         | conc         | conc         |
| Indole-3-acetic acid                   | conc         | conc         | conc         |
| Indole-3-acetonitrile                  | conc         | conc         | conc         |
| Indole-3-acrylic acid                  | dilute       | dilute       | dilute       |
| Indole-3-carboxaldehyde                | conc         | dilute       | dilute       |
| Indole-3-carboxylic acid               | conc         | conc         | conc         |
| Indole-3-ethanol                       | conc         | conc         | conc         |
| Indole-3-lactic acid                   | conc         | dilute       | dilute       |
| Indole-3-propionic acid                | conc         | dilute       | conc         |
| Kynurenine                             | conc         | dilute       | conc         |
| L-Arginine                             | dilute       | dilute       | dilute       |
| L-Glutamic acid                        | dilute       | dilute       | dilute       |
| L-Phenylalanine                        | dilute       | dilute       | dilute       |
| L-Tryptophan                           | dilute       | dilute       | dilute       |
| Melatonin                              | conc         | conc         | conc         |
| Methyl IAA                             | conc         | conc         | conc         |
| N-(2-Phenylacetyl)glycine              | conc         | dilute       | dilute       |
| N-Acetylserotonin                      | conc         | conc         | conc         |
| N-Methylphenethylamine                 | dilute       | conc         | conc         |
| N-Methyltryptamine                     | conc         | conc         | conc         |
| Nudifloramide                          | conc         | dilute       | dilute       |
| p-Coumaric acid                        | conc         | conc         | conc         |
| Phenylacetyl L-glutamine               | conc         | conc         | conc         |
| Tryptamine                             | conc         | conc         | conc         |
| Xanthurenic acid                       | conc         | conc         | conc         |

\* specific procedures of ‘*dilute*’ and ‘*conc*’ (short for ‘concentration’) can be found in Figure S1.

These adaptations in sample preparation are conducted to address the vast dynamic range of endogenous levels so that the analytes could be quantified within the linearity of the assay.

**Table S2.** Analyte recovery in the three sample matrices indicated by spiked SIL internal standards.

| <b>% Recovery</b> | <b>HILIC amide</b> |               |                |               | <b>HSS T3</b> |               |               |               |               |
|-------------------|--------------------|---------------|----------------|---------------|---------------|---------------|---------------|---------------|---------------|
| <b>Sample</b>     | <i>d13-ACh</i>     | <i>d4-5HT</i> | <i>d2-GABA</i> | <i>d3-Trp</i> | <i>d2-IPA</i> | <i>d2-IAA</i> | <i>d5-Gln</i> | <i>d3-Trp</i> | <i>d4-Kyn</i> |
| <b>Brain_1</b>    | 48.96              | 131.68        | 18.83          | 96.49         | 84.77         | 96.51         | 49.96         | 70.07         | 98.14         |
| <b>Brain_2</b>    | 47.28              | 116.06        | 16.85          | 89.49         | 84.62         | 95.22         | 45.84         | 70.55         | 91.37         |
| <b>Brain_3</b>    | 48.36              | 137.19        | 17.11          | 86.33         | 84.36         | 95.59         | 41.86         | 72.34         | 93.20         |
| <b>Brain_4</b>    | 50.02              | 129.40        | 19.62          | 101.32        | 85.94         | 96.59         | 44.29         | 71.72         | 105.04        |
| <b>Serum_1</b>    | 22.90              | 60.42         | 13.12          | 94.68         | 91.37         | 100.20        | 27.46         | 77.06         | 93.79         |
| <b>Serum_2</b>    | 12.59              | 67.86         | 45.63          | 85.35         | 93.94         | 80.39         | 30.86         | 77.04         | 81.46         |
| <b>Serum_3</b>    | 23.42              | 91.35         | 95.11          | 157.96        | 90.16         | 60.49         | 27.81         | 75.78         | 92.43         |
| <b>Serum_4</b>    | 24.99              | 61.12         | 66.56          | 86.72         | 76.85         | 88.34         | 28.10         | 68.32         | 92.77         |
| <b>Feces_1</b>    | 33.07              | 15.01         | 14.02          | 48.97         | 69.63         | 82.14         | 78.20         | 70.56         | 91.44         |
| <b>Feces_2</b>    | 25.11              | 18.49         | 19.89          | 79.34         | 77.65         | 82.81         | 84.10         | 75.08         | 85.19         |
| <b>Feces_3</b>    | 31.59              | 25.85         | 20.30          | 91.04         | 63.74         | 66.78         | 83.02         | 65.07         | 88.29         |
| <b>Feces_4</b>    | 32.94              | 21.32         | 16.24          | 80.55         | 65.32         | 69.02         | 73.89         | 71.78         | 86.66         |
